# Supplementary material for: N-Doped carbon as the anode and ZnCo2O4/N-doped carbon nanocomposite as the cathode for high-performance asymmetric supercapacitor application
Source: Royal Society of Chemistry journal article supplement (doi:10.1039/d1nj01526e), 2021-01-01
Supplement: d1nj01526e1.pdf [file d1nj01526e1.pdf]

## One-for-two” strategy of N-doped carbon as anode and ZnCo<sub>2</sub>O<sub>4</sub>/N-doped carbon nanocomposite as cathode for high-performance asymmetric supercapacitor application

Sivagaami Sundari Gunasekaran<sup>1</sup>, Sushmee Badhulika<sup>\*1</sup>

<sup>1</sup>*Department of Electrical Engineering, Indian Institute of Technology Hyderabad, Hyderabad, 502285, India*

*\*Corresponding author: E-mail: [sbadh@iith.ac.in](mailto:sbadh@iith.ac.in); Telephone: 040-23018443*

### Supplementary Information

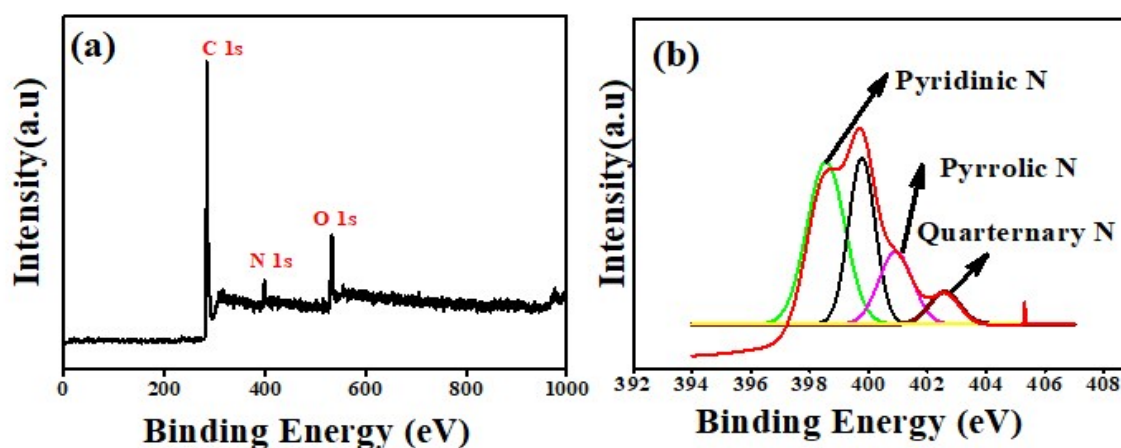

Fig. S1 (a) survey scan (b) de-convoluted N1s spectrum of N-doped carbon

X-ray photon spectroscopy (XPS) survey scan of N-doped carbon is displayed in (Fig. S1(a)), which shows three distinct peaks at 284.5 eV, 400 eV and 530 eV corresponding to C 1s, N 1s and O 1s respectively. The de-convoluted N 1s spectra of N-doped carbon is shown in (Fig. S1(b)), which has peaks of pyridinic (C-N), pyrrolic (C-N) and quaternary (N<sup>+</sup>) at 398.3 eV, 399.7 eV and 499.9 eV, respectively. From the results of the survey scan and the N1s spectra, N-doping of carbon is thus verified and confirmed.
